# Supplementary material for: A pan-variant miniprotein inhibitor protects against SARS-CoV-2 variants
Source: PubMed Central journal article supplement (PMC11326246; doi:10.1101/2024.08.08.606885), 2024-08-10
Supplement: NIHPP2024.08.08.606885v1-supplement-1.pdf [file NIHPP2024.08.08.606885v1-supplement-1.pdf]

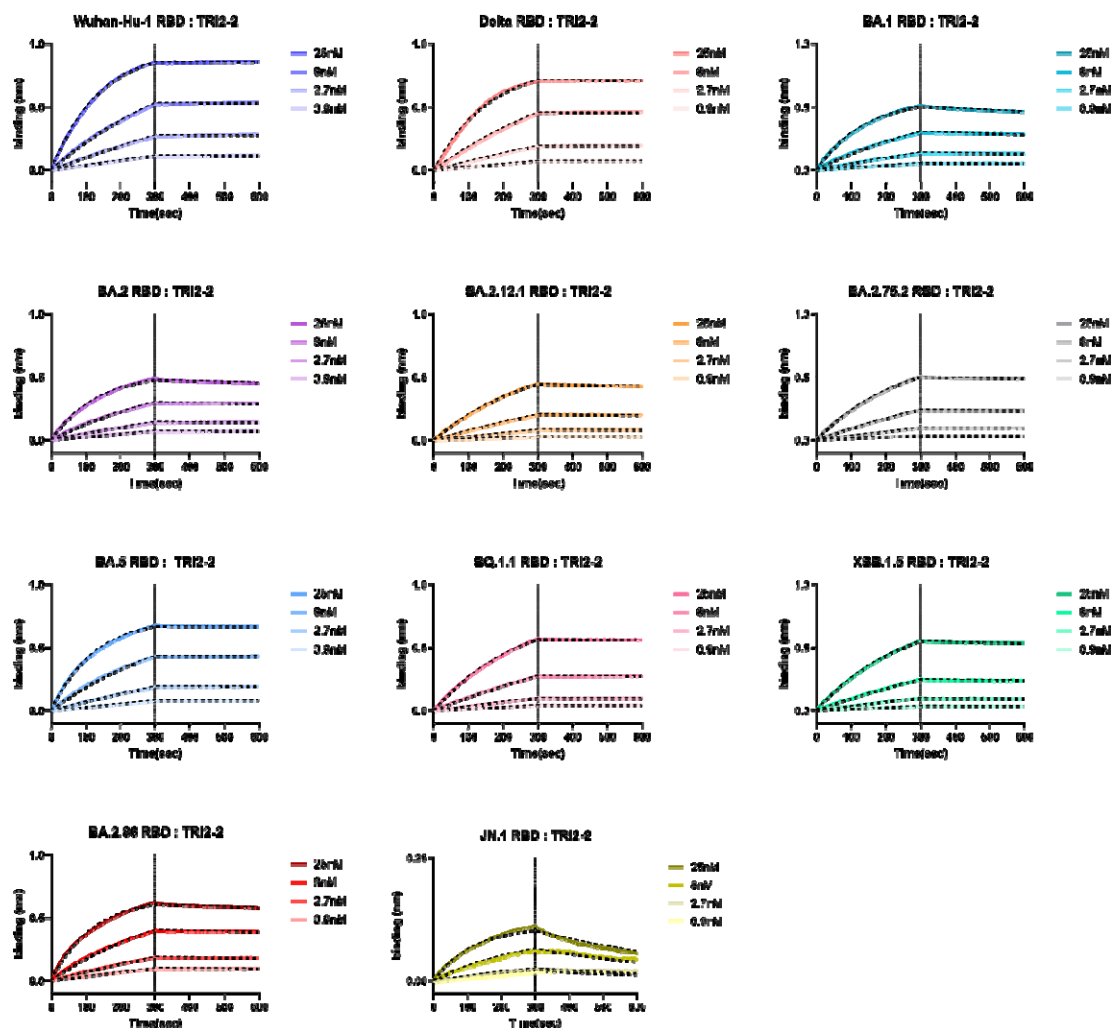

**Supplementary Figure 1. Kinetic analysis of TRI2-2 binding to SARS-CoV-2 variant RBDs immobilized on using biolayer interferometry.** Biotinylated RBDs were immobilized on streptavidin biosensors to a final level of 1 nm shift each. The TRI2-2 concentrations used are provided in the color keys. Dashed black lines represent curve fits obtained using global fitting and a 1:1 binding model in the ForteBio BLI software. Representative graphs are shown from two biological replicates.

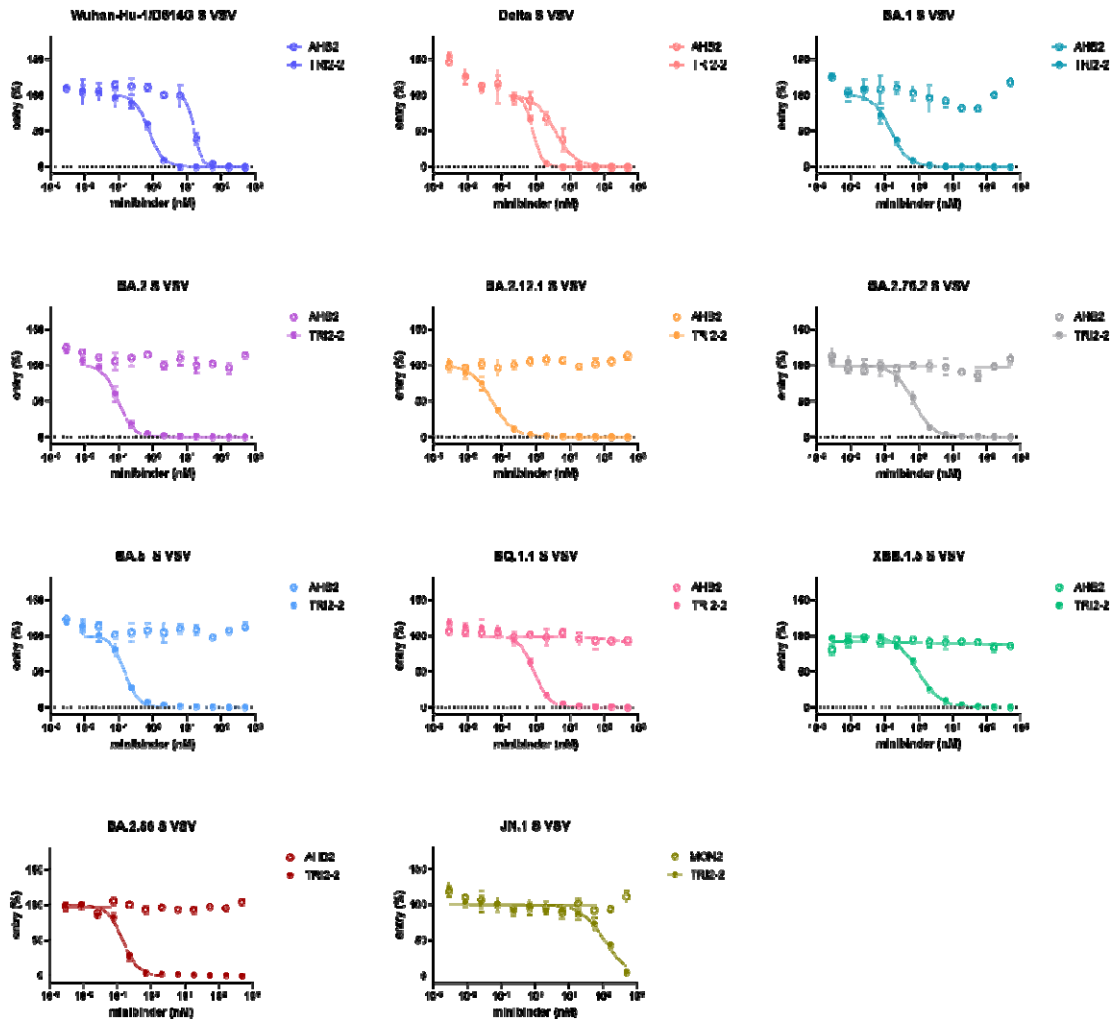

Supplementary Figure 2. Dose-response curves for neutralization of SARS-CoV-2 S variant VSV pseudoviruses by the TRI2-2 and AHB2 miniprotein inhibitors. Each dot represents the mean of three technical replicates. SD shown as lines. Representative graphs are shown from three biological replicates.

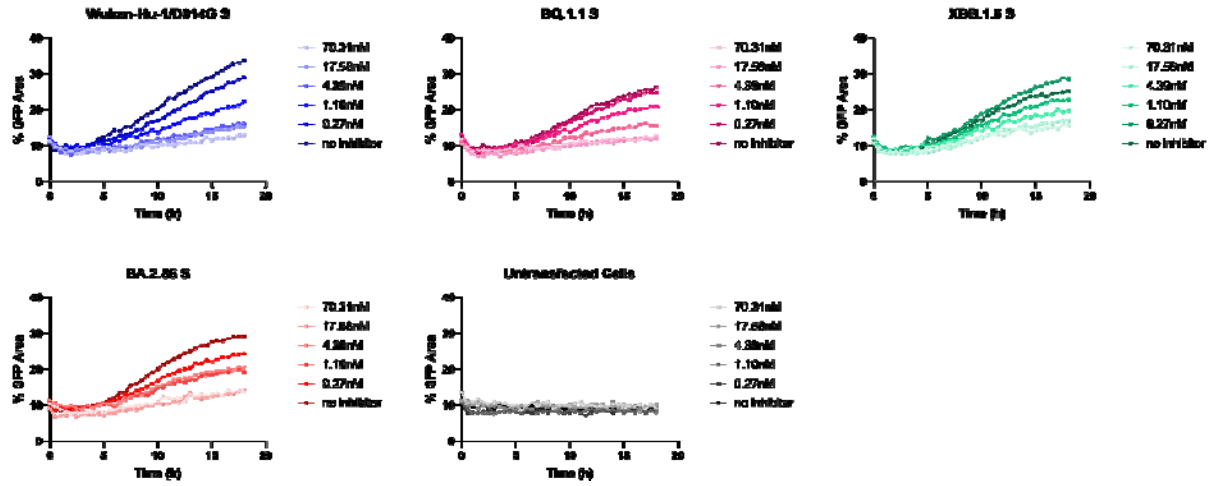

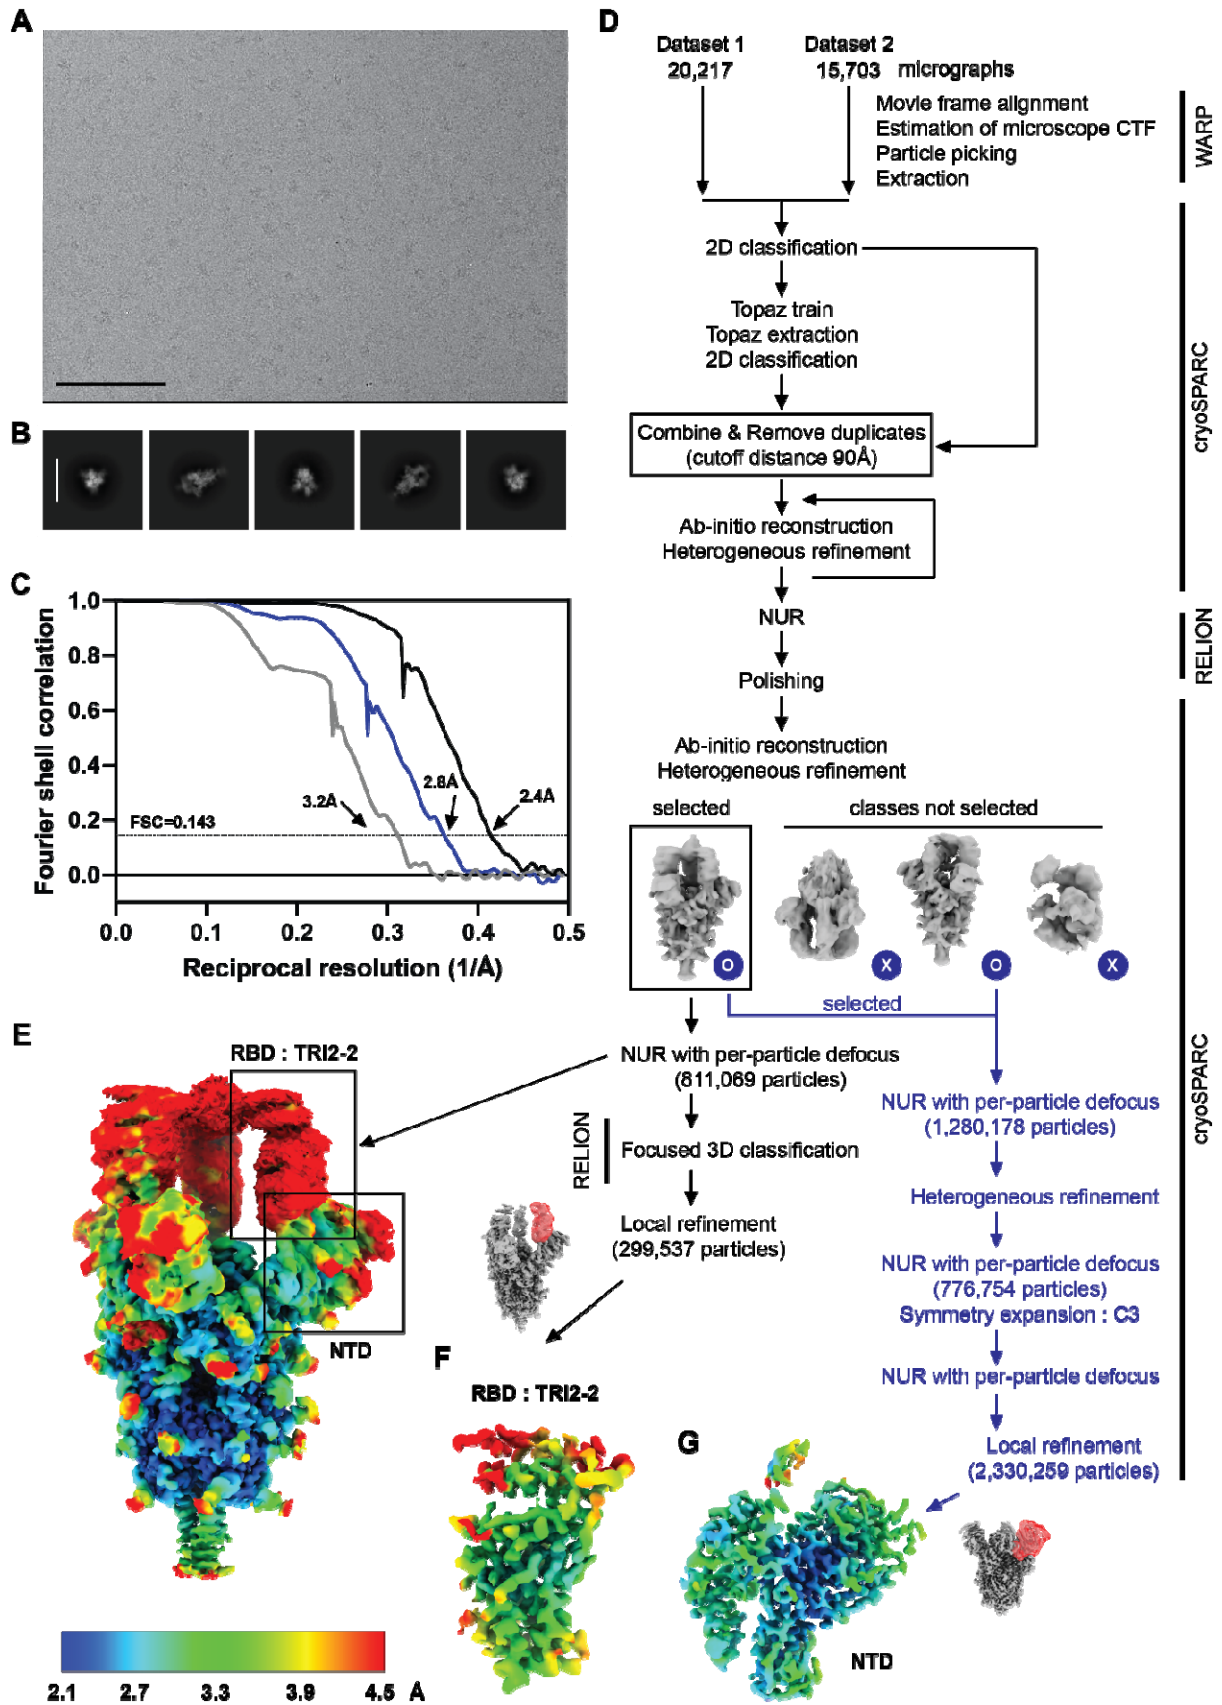

**Supplementary Figure 4. CryoEM data collection and refinement of TRI2-2 bound to the BA.2.86 S glycoprotein trimer.** (A-B) Representative electron micrograph (A) and 2D class averages (B) of SARS-CoV-2 BA.2.86 S in complex with TRI2-2. The scale bar represents 100nm (A) and 210Å (B). (C) Gold-standard Fourier shell correlation curves for the cryoEM reconstructions. The 0.143 cutoff is indicated with a gray dashed line. Black, gray, and blue curves correspond to the global, RBD, and NTD reconstructions, respectively. (D) Data processing flowchart. NUR: non-uniform refinement. Masks used for local refinement are shown in red. (E-G) CryoEM map of SARS-CoV-2 BA.2.86 S in complex with TRI2-2 (E), locally refined map of the BA.2.86 RBD in complex with TRI2-2 (F), and locally refined map of the BA.2.86 NTD (G) colored by local resolution as determined using cryoSPARC.

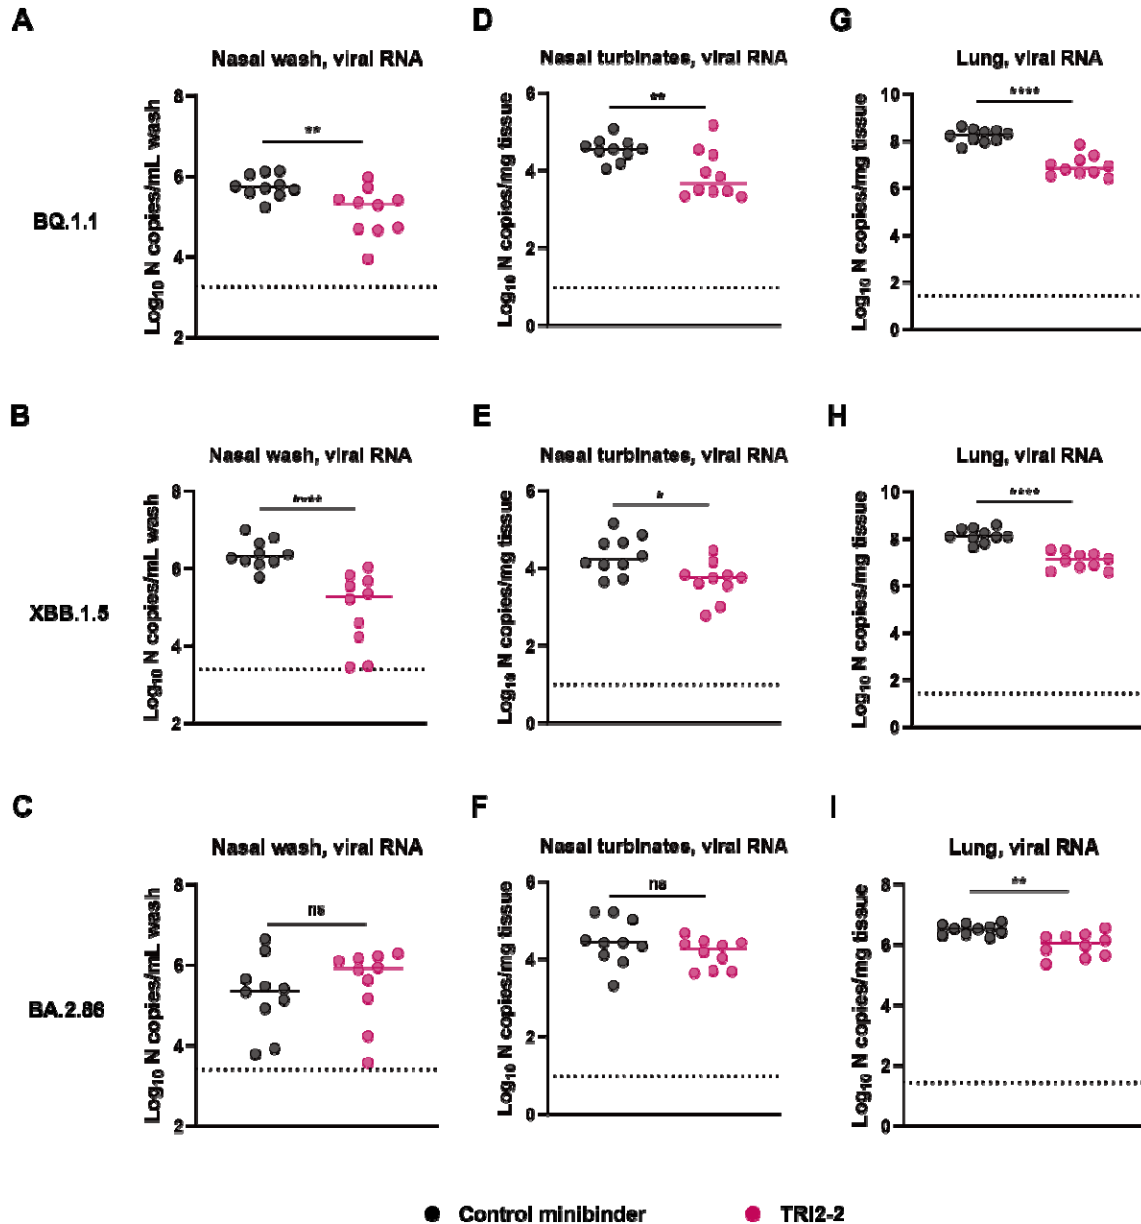

**Supplementary Figure 5. Quantification of viral RNA loads.** (A-C) Genomic viral RNA levels in nasal washes for mice challenged with BQ.1.1 (A), XBB.1.5 (B), or BA.2.86 (C). (D-F) Genomic viral RNA levels in nasal turbinates for mice challenged with BQ.1.1 (D), XBB.1.5 (E), or BA.2.86 (F). (G-I) Genomic viral RNA levels in lungs for mice

challenged with BQ.1.1 (G), or XBB.1.5 (H), or BA.2.86 (I) (lines indicate median;  $n=10$  mice per group per virus challenge, two experiments; Two-tailed Mann-Whitney test between control and TRI2-2 treatment; ns, not significant; \* $P < 0.05$ , \*\* $P < 0.01$ , \*\*\* $P < 0.001$ , \*\*\*\* $P < 0.0001$ ).

**Supplementary Table 1. Representative TRI2-2 binding kinetics and avidities (apparent affinities denoted  $K_{D,app}$ ) to SARS-CoV-2 variant RBDs obtained by bilayer interferometry.** Values shown here are calculated from the curve fit from Supplementary Figure 1.

|                  | $K_{D,app}$ (M) | $K_{D,app}$ error | $k_{on}$ (1/Ms) | $k_{on}$ error | $k_{off}$ (1/s) | $k_{off}$ error |
|------------------|-----------------|-------------------|-----------------|----------------|-----------------|-----------------|
| <b>D614G</b>     | 1.21E-12        | N/A               | 2.86E+05        | 2.42E+02       | 3.46E-07        | N/A             |
| <b>Delta</b>     | 1.14E-12        | N/A               | 2.59E+05        | 4.17E+02       | 2.95E-07        | N/A             |
| <b>BA.1</b>      | 9.28E-10        | 6.07E-12          | 2.84E+05        | 5.09E+02       | 2.64E-04        | 1.66E-06        |
| <b>BA.2</b>      | 4.93E-10        | 5.82E-12          | 2.97E+05        | 5.47E+02       | 1.47E-04        | 1.71E-06        |
| <b>BA.2.12.1</b> | 8.51E-10        | 8.90E-12          | 1.37E+05        | 2.93E+02       | 1.17E-04        | 1.20E-06        |
| <b>BA.2.75.2</b> | 5.42E-10        | 6.40E-12          | 1.65E+05        | 2.67E+02       | 8.93E-05        | 1.05E-06        |
| <b>BA.5</b>      | 3.06E-11        | 4.60E-12          | 3.25E+05        | 4.97E+02       | 9.92E-06        | 1.49E-06        |
| <b>BQ.1.1</b>    | 2.10E-10        | 5.49E-12          | 1.60E+05        | 2.23E+02       | 3.36E-05        | 8.78E-07        |
| <b>XBB.1.5</b>   | 6.58E-10        | 7.02E-12          | 1.60E+05        | 2.78E+02       | 1.05E-04        | 1.11E-06        |
| <b>BA.2.86</b>   | 3.88E-10        | 5.79E-12          | 3.39E+05        | 6.69E+02       | 1.31E-04        | 1.95E-06        |
| <b>JN.1</b>      | 6.19E-09        | 6.11E-11          | 2.82E+05        | 2.42E+03       | 1.75E-03        | 8.53E-06        |

**Supplementary Table 2. CryoEM data collection and refinement statistics.**

|                                       | SARS-CoV-2 S BA.2.86 in complex with minibinder | SARS-CoV-2 BA.2.86 RBD in complex with TRI2-2 minibinder | SARS-CoV-2 BA.2.86 NTD |
|---------------------------------------|-------------------------------------------------|----------------------------------------------------------|------------------------|
| <b>Data collection and processing</b> | EMD-45972<br>PDB 9CWR                           | EMD-45969<br>PDB 9CWP                                    | EMD-45971<br>PDB 9CWQ  |

|                                                        |                    |                    |                    |
|--------------------------------------------------------|--------------------|--------------------|--------------------|
| <b>Magnification</b>                                   | <b>105,000</b>     | <b>105,000</b>     | <b>105,000</b>     |
| <b>Voltage (kV)</b>                                    | <b>300</b>         | <b>300</b>         | <b>300</b>         |
| <b>Electron exposure (e<sup>-</sup>/Å<sup>2</sup>)</b> | <b>53.25</b>       | <b>53.25</b>       | <b>53.25</b>       |
| <b>Defocus range (μm)</b>                              | <b>-0.8 - -1.8</b> | <b>-0.8 - -1.8</b> | <b>-0.8 - -1.8</b> |
| <b>Pixel size (Å)</b>                                  | <b>0.829</b>       | <b>0.829</b>       | <b>0.829</b>       |
| <b>Symmetry imposed</b>                                | <b>C1</b>          | <b>C1</b>          | <b>C1</b>          |
| <b>Final particle images (no.)</b>                     | <b>811,069</b>     | <b>299,537</b>     | <b>2,330,259</b>   |
| <b>Map resolution (Å)</b>                              | <b>2.4</b>         | <b>3.2</b>         | <b>2.8</b>         |
| <b>FSC threshold</b>                                   | <b>0.143</b>       | <b>0.143</b>       | <b>0.143</b>       |
| <b>Map sharpening B factor (Å<sup>2</sup>)</b>         | <b>-76.2</b>       | <b>-117.8</b>      | <b>-91.7</b>       |
|                                                        |                    |                    |                    |
| <b>Validation</b>                                      |                    |                    |                    |
| <b>MolProbity score</b>                                | <b>1.02</b>        | <b>0.82</b>        | <b>1.64</b>        |
| <b>Clashscore</b>                                      | <b>1.80</b>        | <b>0.79</b>        | <b>2.33</b>        |
| <b>Poor rotamers (%)</b>                               | <b>0.95</b>        | <b>0.54</b>        | <b>2.69</b>        |
| <b>Ramachandran plot</b>                               |                    |                    |                    |
| <b>Favored (%)</b>                                     | <b>97.63</b>       | <b>97.68</b>       | <b>95.73</b>       |
| <b>Allowed (%)</b>                                     | <b>2.34</b>        | <b>2.32</b>        | <b>4.27</b>        |
| <b>Disallowed (%)</b>                                  | <b>0.03</b>        | <b>0.00</b>        | <b>0.00</b>        |
